# Supplementary material for: Fe2O3/ZnO heterojunction for efficient electrochemical nitrate reduction to ammonia
Source: Royal Society of Chemistry journal article supplement (doi:10.1039/d4dt01578a), 2024-01-01
Supplement: d4dt01578a1.pdf [file d4dt01578a1.pdf]

## Supporting information

### **Fe<sub>2</sub>O<sub>3</sub>/ZnO heterojunction for efficient electrochemical nitrate reduction to ammonia**

Huilin Zhao, Yun Duan, Xuetao Cheng, Chao Fan, and Yan-Qin Wang\*

Inner Mongolia Key Laboratory of Chemistry and Physics of Rare Earth Materials,  
College of Chemistry and Chemical Engineering, Inner Mongolia University, Hohhot,  
010021, China

E-mail: [yqwang\\_chem@imu.edu.cn](mailto:yqwang_chem@imu.edu.cn)

## **Contents**

- 1. Experimental Section**
- 2. Computational Details**
- 3. Supporting Figures and Table**
- 4. Reference**

## **1. Experimental Section**

### **Electrochemical measurements of nitrate reduction reaction (NO<sub>3</sub>RR)**

#### **Determination of ion concentration**

The ultraviolet-visible (UV-Vis) spectrophotometer was applied to test the ion concentration of before and after-tested electrolytes after diluting to appropriate concentration to match the range of calibration curves. The specific test methods are as follows:

#### **Determination of ammonia**

The produced ammonia was determined by salicylic acid-potassium sodium tartrate chromogenic reagent. First, the electrolyte after electrolysis was diluted to 2 mL by PBS, reaching the concentration range of detection. Then 2 mL of salicylate-potassium sodium tartrate color reagent was added into the diluted electrolyte and mixed thoroughly. 1 mL sodium hypochlorite and 0.2 mL sodium nitroprusside solution were added into the above solution. The absorption intensity at 655 nm was recorded by UV-Vis spectrophotometer after two hours of standing away from light. The concentration-absorbance curve was calibrated with a series of standard ammonium chloride solutions.

#### **Determination of NO<sub>3</sub><sup>-</sup>**

First, the electrolyte after electrolysis was diluted to 2 mL, and 0.1 mL 1 M hydrochloric acid and 0.01 mL 0.8wt % sulfanilic acid solution were added to the diluted solution. After standing for 10 min, the absorption spectrum was measured by UV-visible spectrophotometer and the absorption intensity at 220 and 275 nm

wavelengths was recorded. The final absorbance is calculated as follows:  $A = A_{220\text{nm}} - 2A_{275\text{nm}}$ . The concentration-absorbance curve was calibrated with a series of standard potassium nitrate solutions.

### **Determination of $\text{NO}_2^-$**

The chromogenic reagent was a mixture of p-aminobenzene sulfonamide (0.1 g), N-(1-naphthalene) ethylenediamine hydrochloride (0.01 g), deionized water (5 mL) and phosphoric acid (0.294 mL,  $\rho = 1.685 \text{ g mL}^{-1}$ ). First, the electrolytic solution was diluted to the detection concentration range, and then 1 mL color reagent was added. After shaking for 10 minutes, the absorbance at 540 nm was measured with an ultraviolet-visible spectrophotometer. The nitrite concentration was calculated using the calibration curve obtained.

### **Determination of $\text{N}_2\text{H}_4$**

The coloring reagent was a mixture of anhydrous ethanol (50 mL), hydrochloric acid (5 mL) and p- $\text{C}_9\text{H}_{11}\text{NO}$  (1 g). First, a certain amount of electrolyte was diluted to 2 mL to reach the detection concentration range. 1 mL of color developing reagent was added to the above solution. After standing for 20 min, the absorption intensity at 455 nm was measured and recorded by UV-Vis spectrophotometer.

### **Isotope Labeling Experiments**

In order to verify the source of ammonia,  $\text{K}^{15}\text{NO}_3$  was used as the raw nitrogen source to carry out the isotope labeled nitrate reduction experiment. 0.1 M PBS and 0.1 M  $\text{K}^{15}\text{NO}_3$  were used as the electrolyte. After electroreduction, 2 mL of the obtained  $^{15}\text{NH}_4^+$  electrolyte was taken out, and the pH value of the electrolyte was

adjusted to weakly acidic with 1.0 M hydrochloric acid. Then 0.5 mL DMSO was added to 0.5 mL of the above mixed solution, and finally  $^1\text{H}$  NMR (600 MHz) was used for qualitative analysis.

### **Quantitative detection of nitrogen.**

$\text{N}_2$  generation from the cathodic compartment was analyzed using online gas 11 chromatography (GC 2060) equipped with a thermally conductive detector (TCD) and 12 a flammable ionization detector (FID).

The faradaic efficiency (FE) of  $\text{N}_2$  was calculated by the following equation:

$$\text{FE}_{\text{N}_2} = \frac{z * F * n}{Q} * 100\%$$

Where F is the Faraday constant, z is the number of transferred electrons, n is the mole number, and Q is the amount of the total charge passing through the system.

## **2. Computational Details**

We have employed the first-principles<sup>1,2</sup> to perform density functional theory (DFT) calculations within the generalized gradient approximation (GGA) using the Perdew-Burke-Ernzerhof (PBE)<sup>3</sup> formulation. We have chosen the projected augmented wave (PAW) potentials<sup>4-5</sup> to describe the ionic cores and take valence electrons into account using a plane wave basis set with a kinetic energy cutoff of 520 eV. Partial occupancies of the Kohn-Sham orbitals were allowed using the Gaussian smearing method and a width of 0.05 eV. The electronic energy was considered self-consistent when the energy change was smaller than  $10^{-5}$  eV. A geometry optimization was considered convergent when the force change was smaller than  $0.05 \text{ eV } \text{\AA}^{-1}$ . The Brillouin zone integration is performed using  $2 \times 2 \times 1$  Monkhorst-Pack k-point sampling for a structure. Finally, the adsorption energies ( $E_{\text{ads}}$ ) were calculated as  $E_{\text{ads}} = E_{\text{ad/sub}} - E_{\text{ad}} - E_{\text{sub}}$ , where  $E_{\text{ad/sub}}$ ,  $E_{\text{ad}}$ , and  $E_{\text{sub}}$  are the total energies of the optimized adsorbate/substrate system, the adsorbate in the structure, and the clean

substrate, respectively. The free energy was calculated using the equation:

$$G = E_{\text{ads}} + \text{ZPE} - TS$$

where  $G$ ,  $E_{\text{ads}}$ , ZPE and  $TS$  are the free energy, total energy from DFT calculations, zero-point energy and entropic contributions, respectively, where  $T$  is set to 300 K.

### 3. Supporting Figures and Tables

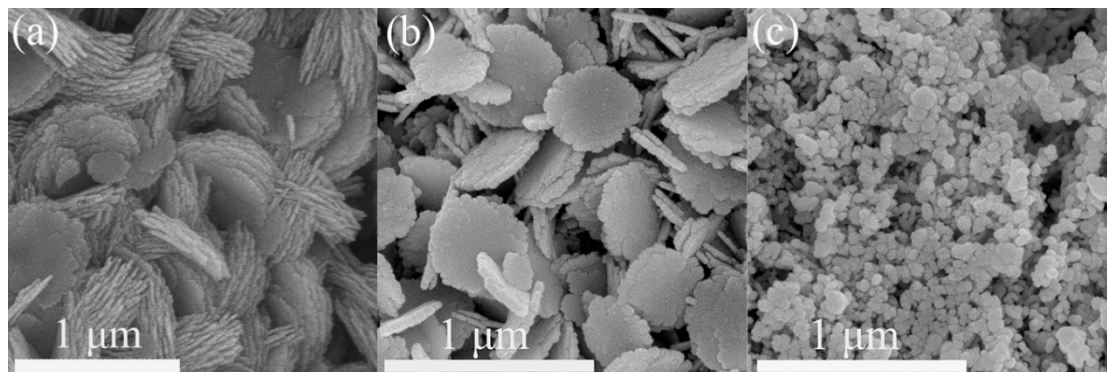

**Fig. S1** (a) SEM images of Fe-MOF, (b) Fe<sub>2</sub>O<sub>3</sub>, (c) ZnO.

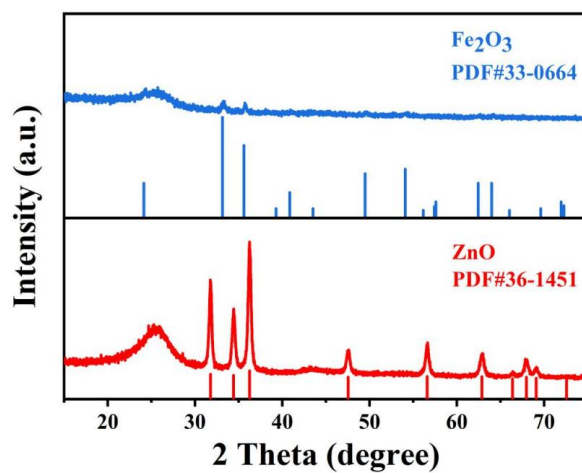

**Fig. S2** The XRD patterns of Fe<sub>2</sub>O<sub>3</sub> and ZnO.

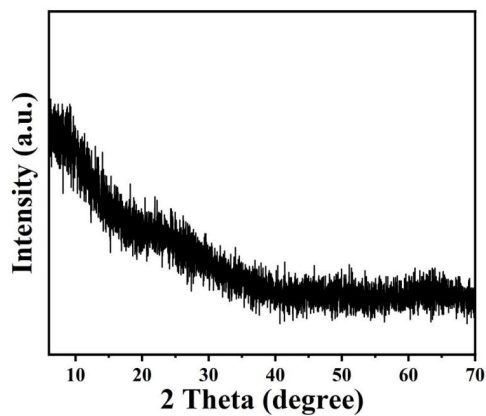

**Fig. S3** The XRD pattern of Fe-MOF.

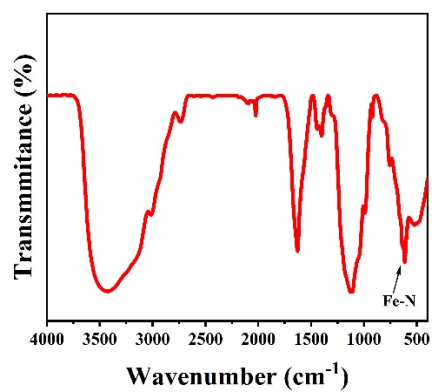

**Fig. S4** The FTIR spectrum of Fe-MOF.

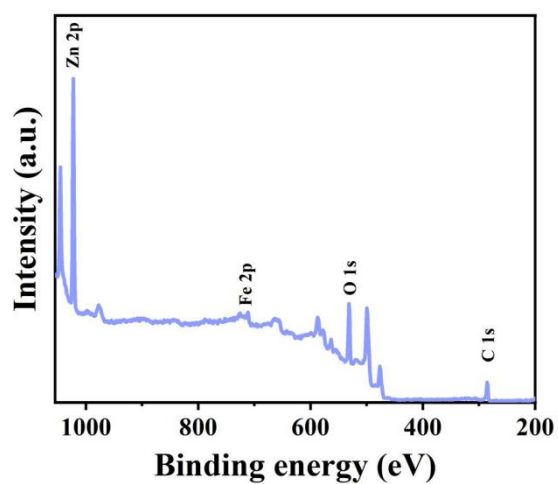

**Fig. S5** The XPS survey spectra of Fe<sub>2</sub>O<sub>3</sub>/ZnO.

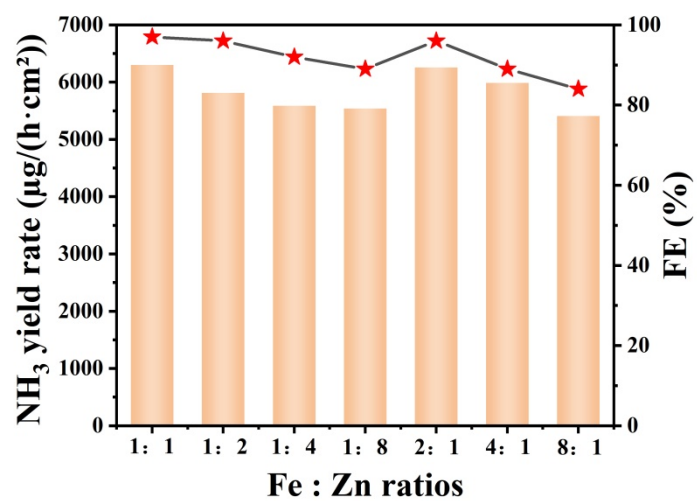

**Fig. S6** The NH<sub>3</sub> yield and NH<sub>3</sub> Faraday efficiency of Fe<sub>2</sub>O<sub>3</sub>/ZnO with different Fe:Zn feed ratios at -1.0 V vs. RHE.



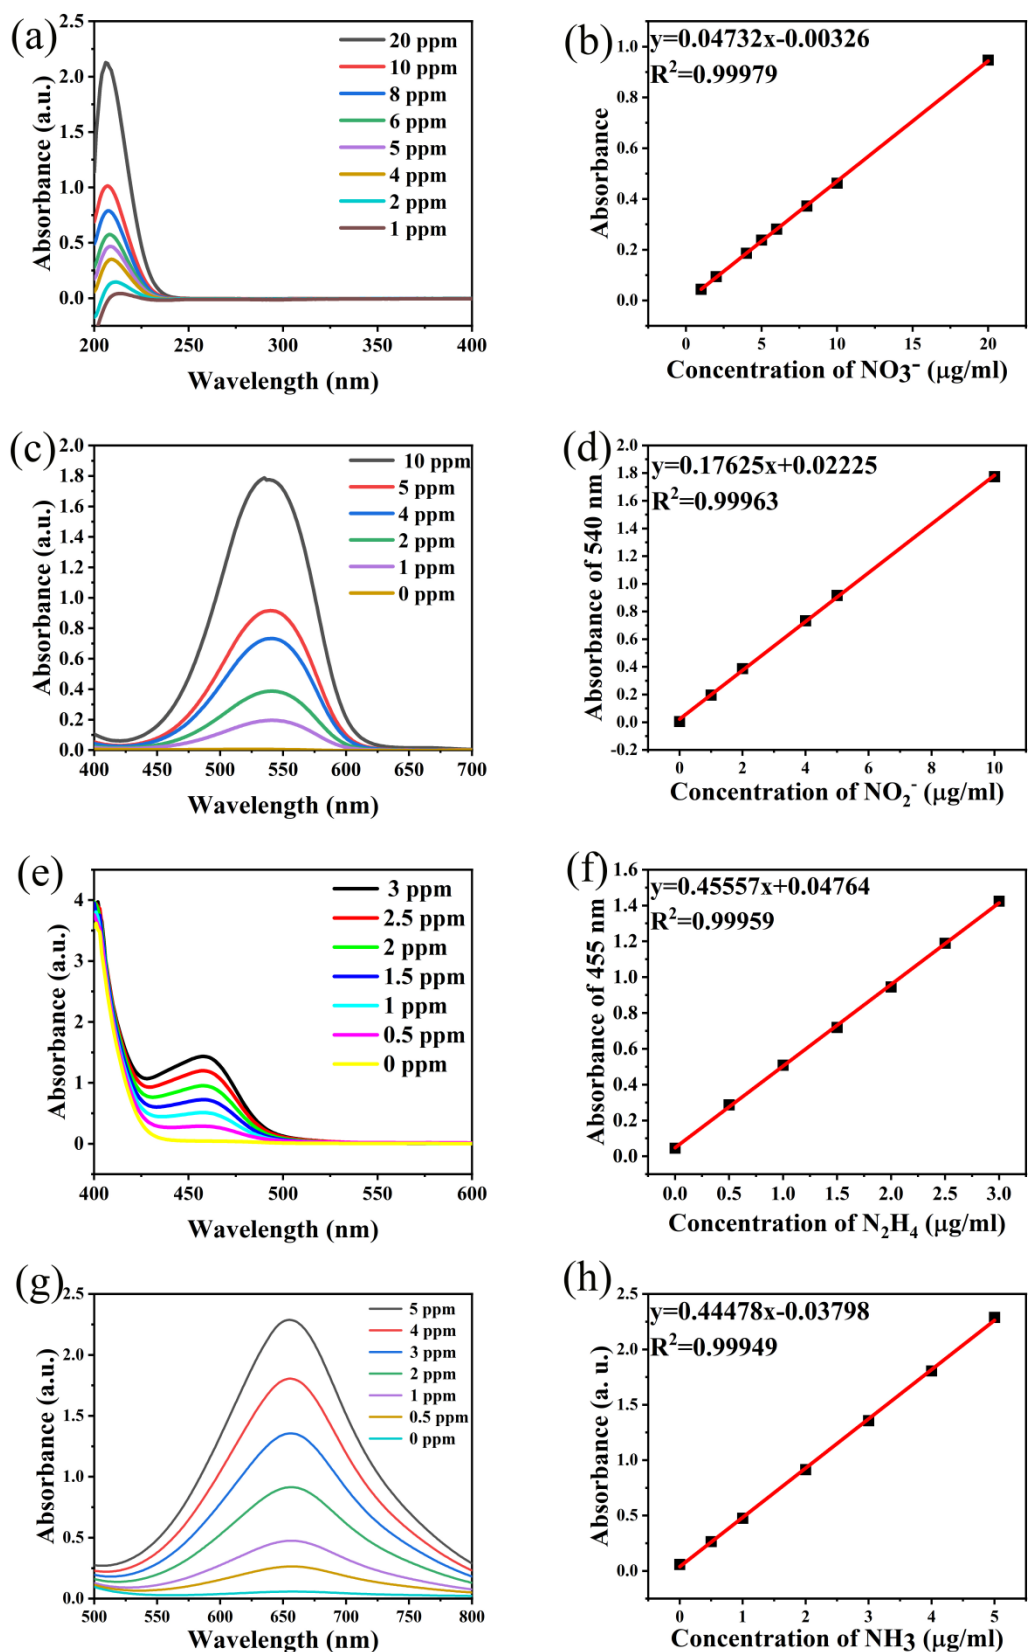

**Fig. S7** (a) UV-Vis absorption spectroscopies for various concentrations of  $\text{NO}_3^-$ -N.

(b) Calibration curve used to estimate the concentration of  $\text{NO}_3^-$ -N. (c) UV-Vis

absorption spectroscopies for various concentrations of  $\text{NO}_2^-$ -N. (d) Calibration curve used to estimate the concentration of  $\text{NO}_2^-$ -N. (e) UV-Vis absorption spectroscopies for various concentrations of  $\text{N}_2\text{H}_4$ . (f) Calibration curve used to estimate the concentration of  $\text{N}_2\text{H}_4$ . (g) UV-Vis absorption spectroscopies for various concentrations of  $\text{NH}_3$ . (h) Calibration curve used to estimate the concentration of  $\text{NH}_3$ .

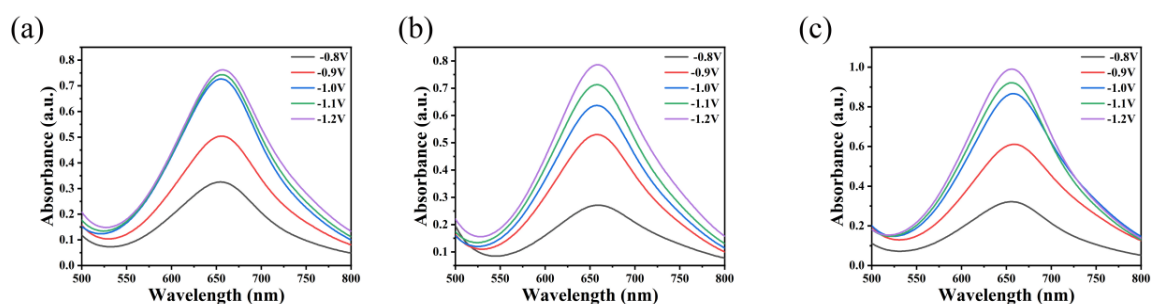

**Fig. S8** The UV-vis spectra for (a) the first time (b) the second time and (c) the third time at five different potentials.

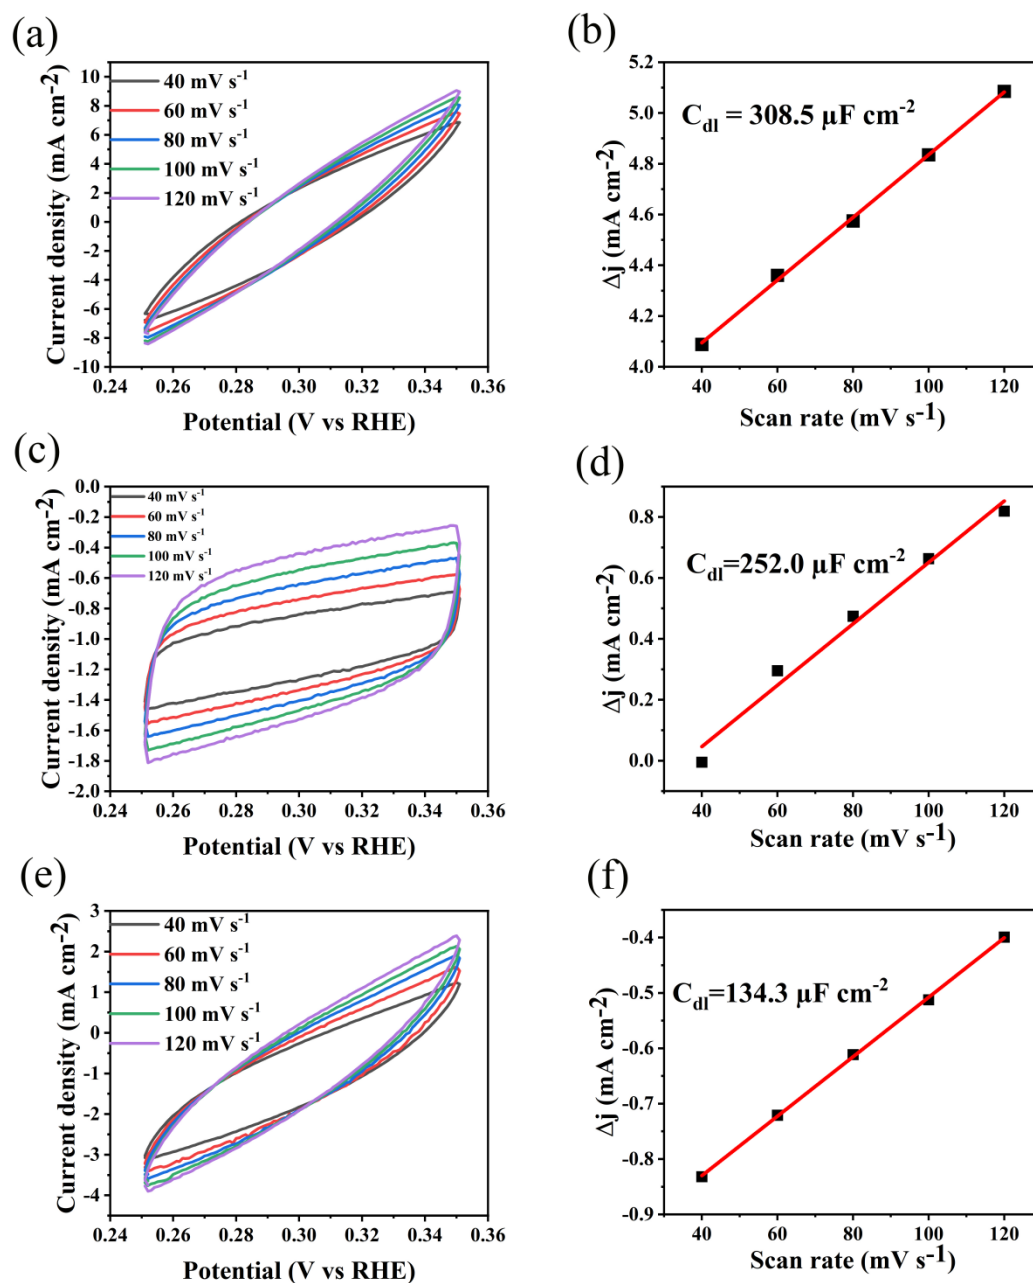

**Fig. S9** (a) The CV curves at various scan rates and (b) capacitive current densities of the Fe<sub>2</sub>O<sub>3</sub>/ZnO. (c) The CV curves at various scan rates and (d) capacitive current densities of the Fe<sub>2</sub>O<sub>3</sub>. (e) The CV curves at various scan rates and (f) capacitive current densities of the ZnO.

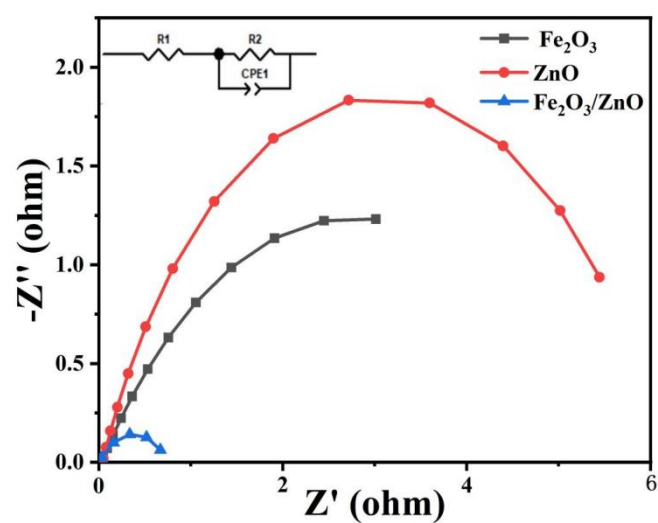

**Fig. S10** Nyquist plots of Fe<sub>2</sub>O<sub>3</sub>/ZnO, Fe<sub>2</sub>O<sub>3</sub> and ZnO at -1.0 V (vs. RHE) in 0.1 M PBS solution.

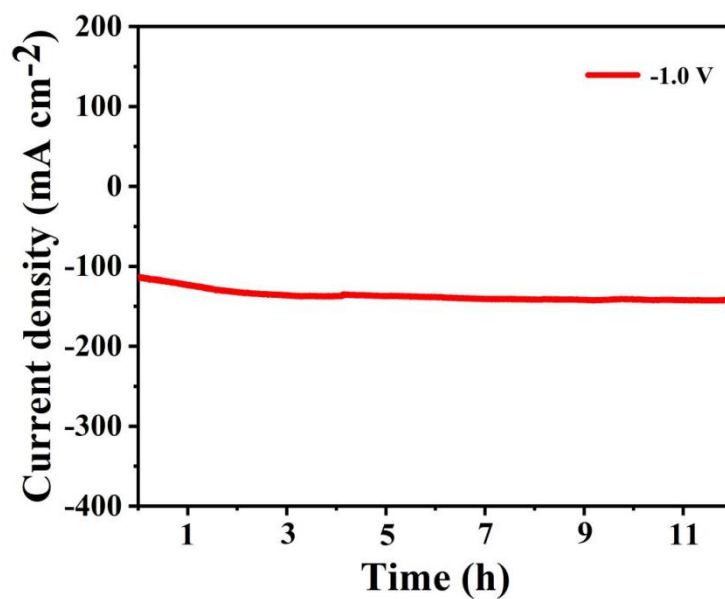

**Fig. S11** The i-t curve of Fe<sub>2</sub>O<sub>3</sub>/ZnO tested continuously for 12 hours at -1.0 V (vs. RHE).

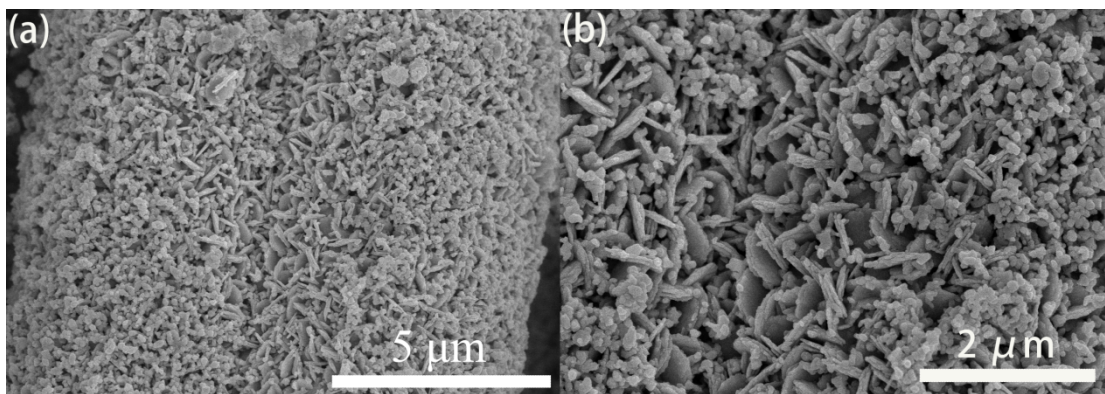

**Fig. S12** (a-b) SEM images of Fe<sub>2</sub>O<sub>3</sub>/ZnO after NO<sub>3</sub>RR test.

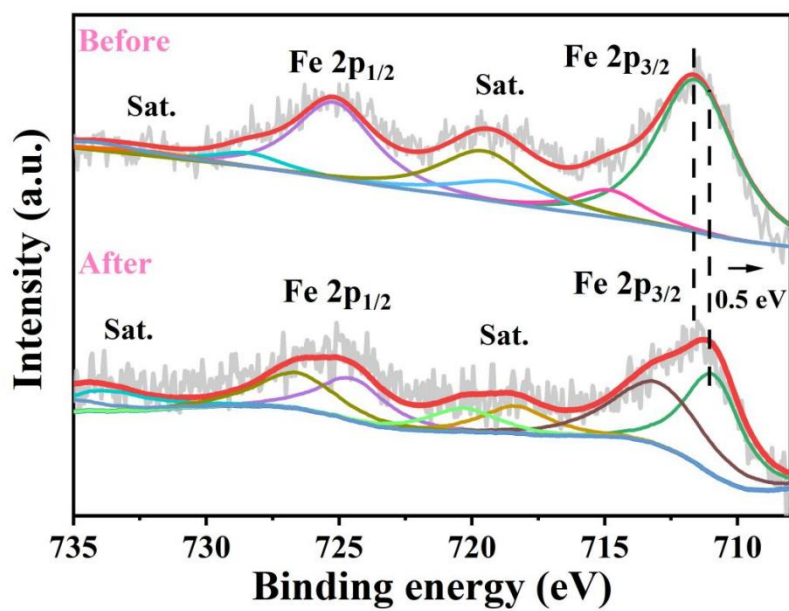

**Fig. S13** High-resolution XPS spectra of Fe 2p after NO<sub>3</sub>RR test.

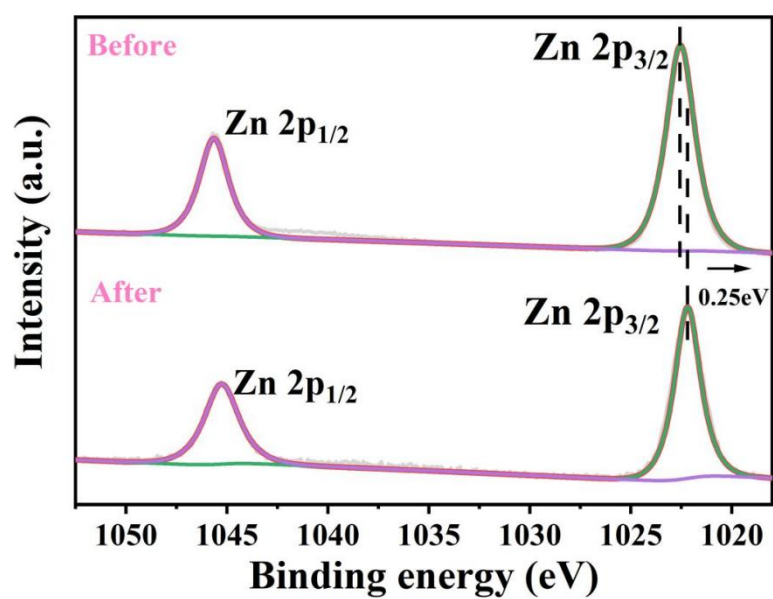

**Fig. S14** High-resolution XPS spectra of Zn 2p after NO<sub>3</sub>RR test.

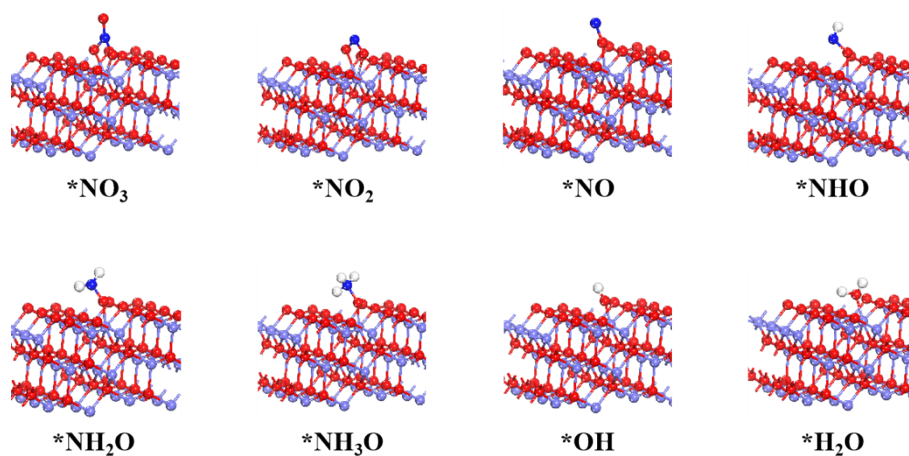

**Fig. S15** The proposed reaction mechanism of nitrate electroreduction on the surface of ZnO.

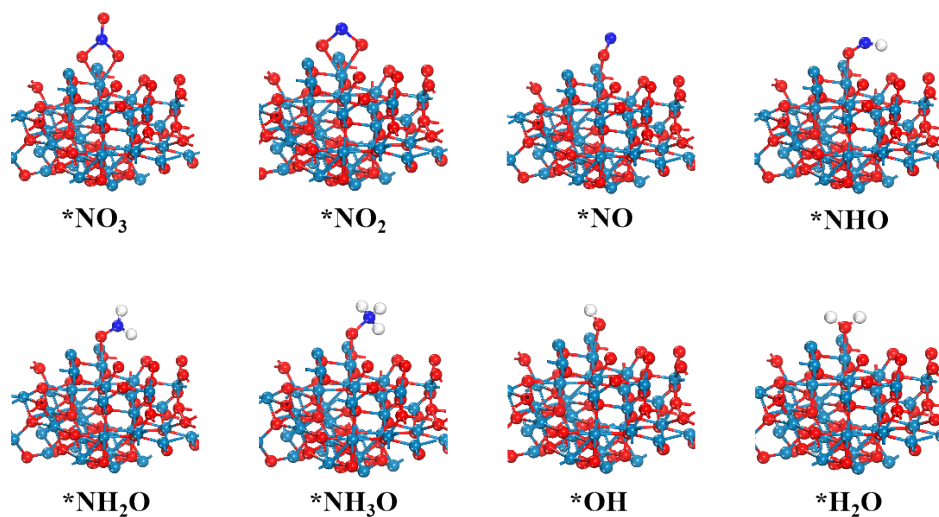

**Fig. S16** The proposed reaction mechanism of nitrate electroreduction on the surface of  $\text{Fe}_2\text{O}_3$ .

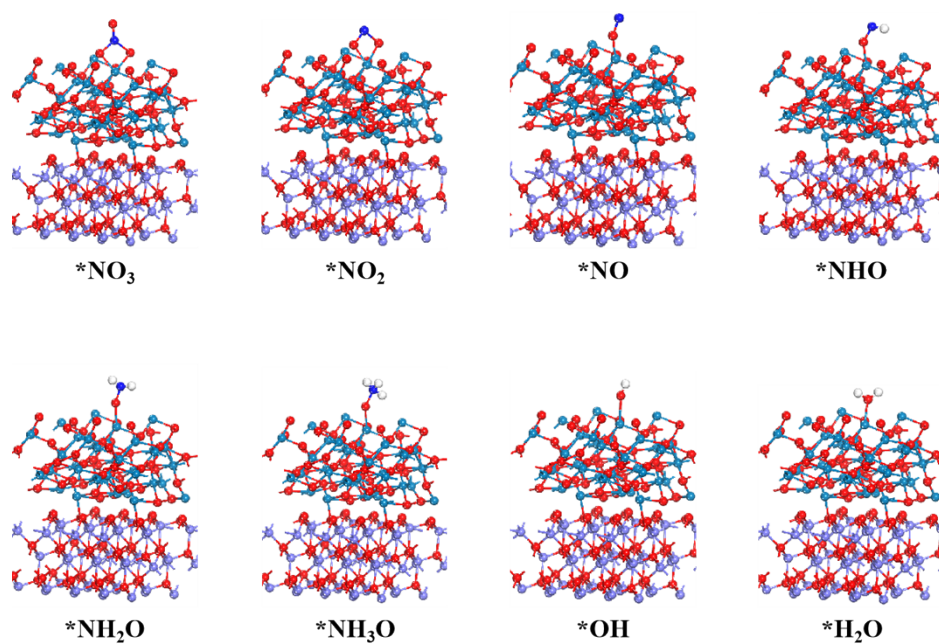

**Fig. S17** The proposed reaction mechanism of nitrate electroreduction on the surface of  $\text{Fe}_2\text{O}_3/\text{ZnO}$ .

**Table S1.** The comparison of electrochemical ENO<sub>3</sub>RR performance between Fe<sub>2</sub>O<sub>3</sub>/ZnO and some other reported electrocatalysts in neutral electrolytes.

| Electrocatalyst                      | Electrolytes                                                                                 | Performance                                                                                                                                                   | Ref.             |
|--------------------------------------|----------------------------------------------------------------------------------------------|---------------------------------------------------------------------------------------------------------------------------------------------------------------|------------------|
| Fe <sub>2</sub> O <sub>3</sub> /ZnO  | 0.1 M KNO <sub>3</sub><br>0.1 M PBS                                                          | rNH <sub>3</sub> : 0.37 mmol h <sup>-1</sup> cm <sup>-2</sup><br>(6.3 mg h <sup>-1</sup> cm <sup>-2</sup> )<br>FE NH <sub>3</sub> : 97.4%<br>(-1.0 V vs. RHE) | <b>This work</b> |
| OD-Cu cubes                          | 0.1 M KNO <sub>3</sub><br>0.1 M PBS                                                          | rNH <sub>3</sub> : 0.22 mmol h <sup>-1</sup> cm <sup>-2</sup><br>FE NH <sub>3</sub> : 93.9%<br>(-0.9 V vs. RHE)                                               | 6                |
| Co <sub>2</sub> P                    | 0.1 M NaNO <sub>3</sub><br>0.5 M Na <sub>2</sub> SO <sub>4</sub>                             | rNH <sub>3</sub> : 0.30 mmol h <sup>-1</sup> cm <sup>-2</sup><br>FE NH <sub>3</sub> : 88.6%<br>(-0.6 V vs. RHE)                                               | 7                |
| PdCoO/NF                             | 0.5 M PBS<br>200 ppm NO <sub>3</sub> <sup>-</sup>                                            | rNH <sub>3</sub> : 0.204 mmol h <sup>-1</sup> cm <sup>-2</sup><br>FE NH <sub>3</sub> : 88.6%<br>(-1.3 V vs. RHE)                                              | 8                |
| FOSP-Cu-0.1                          | 0.5 M Na <sub>2</sub> SO <sub>4</sub><br>0.1 M KNO <sub>3</sub>                              | rNH <sub>3</sub> : 0.10 mmol h <sup>-1</sup> cm <sup>-2</sup><br>FE NH <sub>3</sub> : 93.91%<br>(-0.266 V vs. RHE)                                            | 9                |
| Ni <sub>1</sub> Fe <sub>1</sub>      | 0.1 M Na <sub>2</sub> SO <sub>4</sub><br>200 ppm NO <sub>3</sub> <sup>-</sup>                | rNH <sub>3</sub> : 0.216 mmol h <sup>-1</sup> cm <sup>-2</sup><br>FE NH <sub>3</sub> : 74.8%<br>(-0.75 V vs. RHE)                                             | 10               |
| Cu <sub>S</sub> ANPC                 | 0.01 M PBS<br>500 mgL <sup>-1</sup> NO <sub>3</sub> <sup>-</sup>                             | rNH <sub>3</sub> : 0.153 mmol h <sup>-1</sup> cm <sup>-2</sup><br>FE NH <sub>3</sub> : 87.2%<br>(-1.1 V vs. RHE)                                              | 11               |
| Co <sub>3</sub> O <sub>4</sub> /Co-h | 0.1 M Na <sub>2</sub> SO <sub>4</sub><br>1000 mgL <sup>-1</sup> NO <sub>3</sub> <sup>-</sup> | rNH <sub>3</sub> : 0.26 mmol h <sup>-1</sup> cm <sup>-2</sup><br>FE NH <sub>3</sub> : 88.7%<br>(-0.8 V vs. RHE)                                               | 12               |



|                       |                                       |                                                               |    |
|-----------------------|---------------------------------------|---------------------------------------------------------------|----|
| Fe SAC                | 0.1M K <sub>2</sub> SO <sub>4</sub>   | rNH <sub>3</sub> : 0.46 mmol h <sup>-1</sup> cm <sup>-2</sup> | 13 |
|                       | 0.5 M KNO <sub>3</sub>                | FE NH <sub>3</sub> : 74.9%<br>(-0.66 V vs. RHE)               |    |
| Cu/TiO <sub>2-x</sub> | 0.5 M Na <sub>2</sub> SO <sub>4</sub> | rNH <sub>3</sub> : 0.11 mmol h <sup>-1</sup> mg <sup>-1</sup> | 14 |
|                       | 200 ppm NO <sub>3</sub> <sup>-</sup>  | FE NH <sub>3</sub> : 81.3%<br>(-0.75 V vs. RHE)               |    |
| Cu-NBs-100            | 0.1 M PBS                             | rNH <sub>3</sub> : 0.13 mmol h <sup>-1</sup> cm <sup>-2</sup> | 15 |
|                       | 500 ppm NO <sub>3</sub> <sup>-</sup>  | (-0.15 V vs. RHE)                                             |    |

**Table S2.** N<sub>2</sub> production of Fe<sub>2</sub>O<sub>3</sub>/ZnO at different potentials.

| Potential (V) | The yield of the produced N <sub>2</sub> (g) |
|---------------|----------------------------------------------|
| -1.411        | 0.812×10 <sup>-3</sup>                       |
| -1.511        | 0.644×10 <sup>-3</sup>                       |
| -1.611        | 0.448×10 <sup>-3</sup>                       |
| -1.711        | 0.532×10 <sup>-3</sup>                       |
| -1.811        | 0.700×10 <sup>-3</sup>                       |

**Table S3.** The calculated reaction free energy for the elementary steps over three catalysts.

| Elementary step                       | ZnO   | Fe <sub>2</sub> O <sub>3</sub> | Fe <sub>2</sub> O <sub>3</sub> /ZnO |
|---------------------------------------|-------|--------------------------------|-------------------------------------|
| *+NO <sub>3</sub> →*NO <sub>3</sub>   | -0.43 | -0.79                          | -1.16                               |
| *NO <sub>3</sub> →*NO <sub>2</sub>    | -0.63 | -0.53                          | -0.80                               |
| *NO <sub>2</sub> →*NO                 | -2.14 | -2.36                          | -2.58                               |
| *NO→*NHO                              | 0.95  | 0.68                           | 0.47                                |
| *NHO→*NH <sub>2</sub> O               | -0.34 | -0.90                          | -0.70                               |
| *NH <sub>2</sub> O→*NH <sub>3</sub> O | -1.42 | -0.67                          | -0.57                               |
| *NH <sub>3</sub> O→*OH                | -2.34 | -1.29                          | -0.55                               |

|                                      |       |       |       |
|--------------------------------------|-------|-------|-------|
| *OH→*H <sub>2</sub> O                | -0.36 | -0.70 | -0.50 |
| *H <sub>2</sub> O→*+H <sub>2</sub> O | 0.40  | 0.26  | 0.09  |

#### 4. Reference

1. G. Kresse and J. Furthmüller, *Comput. Mater. Sci.* 1996, **6**, 15-50.
2. G. Kresse and J. Furthmüller, *Phys. Rev. B* 1996, **54**, 11169-11186.
3. J. P. Perdew, K. Burke and M. Ernzerhof, *Phys. Rev. Lett.* 1996, **77**, 3865-3868.
4. G. Kresse and D. Joubert, *Phys. Rev. B* 1999, **59**, 1758-1775.
5. P. E. Blöchl, *Phys. Rev. B* 1994, **50**, 17953-17979
6. N. Zhou, Z. Wang, N. Zhang, D. Bao, H. X. Zhong and X. B. Zhang, *ACS Catal.* 2023, **13**, 7529-7537.
7. L. C. Yi, P. Shao and Z. H. Wen, *New J. Chem.* 2023, **47**, 9545-9549.
8. M. Liu, Q. Mao, K. Shi, Z. W. Qiang, X. You, N. L. Xiao, W. Liang and J. W. Hong, *ACS Appl. Mater. Interfaces* 2022, **14**, 13169-13176.
9. Y. L. Zhao, Y. Liu, Z. J. Zhang, Z. K. Mo, C. Y. Wang and S. Y. Gao, *Nano Energy* 2022, **97**, 107124.
10. W. Xuan, J. M. Ai, H. Jun, L. Dan, A. T. Kuvarega, B. B. Mamba and Z. G. Jian, *Inorg. Chem. Front.*, 2023, **10**, 666.
11. Y. Z. Xue, G. Qin, D. Fan, Z. Kun, C. Shuo, T. Y. Hong and Q. Xie, *Chem. Eng. J.*, 2023, **466**, 143314.
12. F. L. Zhao, G. T. Hai, X. Li, Z. Y. Jiang and H. H. Wang, *Chem. Eng. J.* 2023, **461**, 141960.
13. Z. Y. Wu, M. Karamad, X. Yong, Q. Huang, D. A. Cullen, P. Zhu, C. Xia, Q. Xiao, M. Shakouri, F. Y. Chen, J. Y. T. Kim, Y. Xia, K. Heck, Y. Hu, M. S. Wong, Q. Li, I. Gates, S. Siahrostami and H. Wang, *Nat. Commun.* 2021, **12**, 2870.
14. X. Zhang, C. H. Wang, Y. M. Guo, B. Zhang, Y. T. Wang and Y. F. Yu, *J. Mater. Chem. A* 2022, **10**, 6448-6453.
15. Q. Hu, Y. J. Qin, X. D. Wang, Z. Y. Wang, X. W. Huang, H. J. Zheng, K. R.

Gao, H. P. Yang, P. X. Zhang, M. H. Shao and C. X. He, *Energy Environ. Sci.* 2021, **14**, 4989-4997.
